# Supplementary material for: Early EEG contributes to multimodal outcome prediction of postanoxic coma
Source: PubMed Central journal article supplement — Neurology. 2015 Jul 14;85(2):137–43. doi: 10.1212/WNL.0000000000001742 (PMC4515041; doi:10.1212/wnl.0000000000001742), 2015-07-14
Supplement: supp_WNL.0000000000001742_Figure_e-1.pdf [file supp_WNL.0000000000001742_Figure_e-1.pdf]

Figure e-1. Propofol induced burts-suppression (A) and burst-suppression with identical bursts (B).

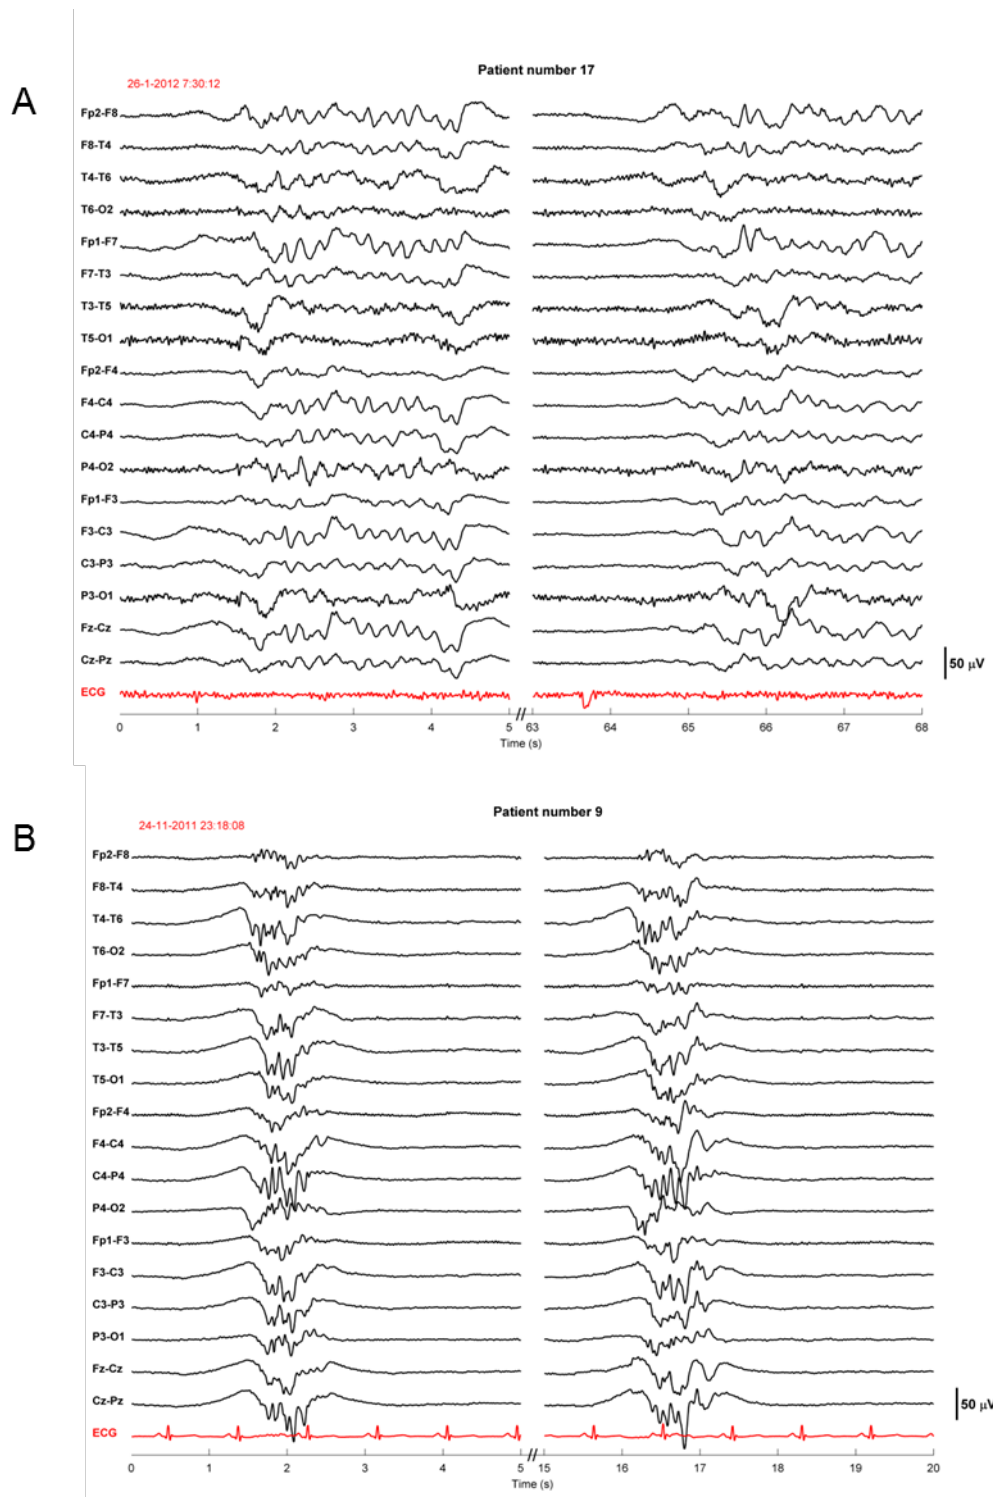

In propofol induced burst-suppression, bursts are heterogeneous and appear and disappear gradually, often without bilateral synchrony. Otherwise, in identical burst-suppression patterns, subsequent bursts are almost exactly similar, with bilateral synchrony, flat inter-burst intervals, and abrupt transitions between bursts and suppressions. Filter settings 0.5-25 Hz.
